# Supplementary material for: Quantitative calculation of a confocal synchrotron radiation micro-X-ray fluorescence imaging technique and application on individual fluid inclusion
Source: Royal Society of Chemistry journal article supplement (doi:10.1039/d1ja00221j), 2021-01-01
Supplement: d1ja00221j1.pdf [file d1ja00221j1.pdf]

## Electronic Supplementary Information

### Quantitative calculation of confocal synchrotron radiation micro X-ray fluorescence imaging technique and application on individual fluid inclusion

Xiao-Sheng Lin,<sup>abc</sup> Li-Li Zhang,<sup>\*ac</sup> Jiu-Hua Xu,<sup>d</sup> Yan He,<sup>c</sup> Yi Zheng,<sup>c</sup> Shuai Yan,<sup>c</sup> Dong-Xu  
Liang,<sup>c</sup> and Ai-Guo Li<sup>\*ac</sup>

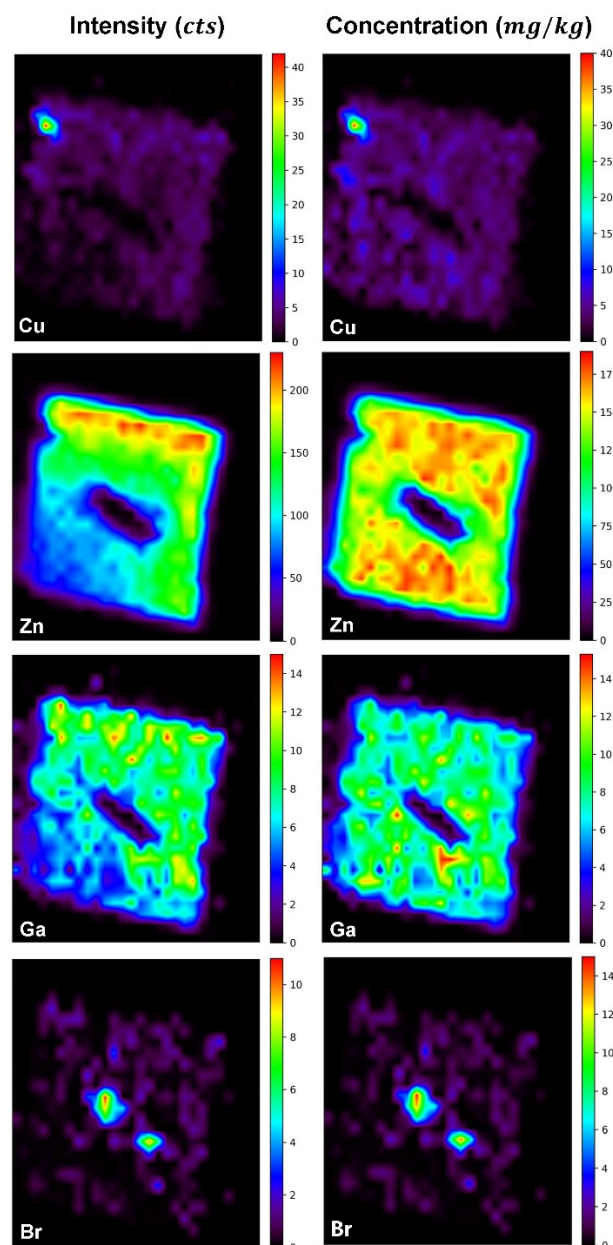

**Fig. S1** The intensity distribution maps (left) of Cu, Zn, Ga and Br  $K\alpha$  XRF and concentration distribution maps (right) of those elements by the quantitative calculation model.
